# Supplementary material for: N- and C-alkylation of seven-membered iminosugars generates potent glucocerebrosidase inhibitors and F508del-CFTR correctors
Source: Royal Society of Chemistry journal article supplement (doi:10.1039/c4ob00325j), 2014-01-01
Supplement: c4ob00325j2.pdf [file c4ob00325j2.pdf]

## ***N*- and *C*-functionalisation of seven-membered iminosugars with long alkyl chains generate potent glycosidase inhibitors and F508del-CFTR correctors**

J. Désiré,<sup>a\*</sup> M. Mondon,<sup>a</sup> N. Fontelle,<sup>a</sup> S. Nakagawa,<sup>b</sup> Y. Hirokami,<sup>b</sup> I. Adachi,<sup>b</sup> R. Iwaki,<sup>b</sup> G. W. J. Fleet,<sup>c</sup> D. S. Alonzi,<sup>d</sup> G. Twigg,<sup>d</sup> T. D. Butters,<sup>d</sup> J. Bertrand,<sup>e</sup> V. Cendret,<sup>a</sup> F. Becq,<sup>e</sup> C. Norez,<sup>e</sup> J. Marrot,<sup>f</sup> A. Kato,<sup>b\*</sup> Y. Blériot<sup>a\*</sup>

### **SUPPORTING INFORMATION**

#### **Table of contents:**

|         |                                                                   |
|---------|-------------------------------------------------------------------|
| Page 2  | <sup>1</sup> H and <sup>13</sup> C spectra of compound <b>14</b>  |
| Page 3  | <sup>1</sup> H and <sup>13</sup> C spectra of compound <b>15a</b> |
| Page 4  | <sup>1</sup> H and <sup>13</sup> C spectra of compound <b>15b</b> |
| Page 5  | <sup>1</sup> H and <sup>13</sup> C spectra of compound <b>15c</b> |
| Page 6  | <sup>1</sup> H and <sup>13</sup> C spectra of compound <b>15d</b> |
| Page 7  | <sup>1</sup> H and <sup>13</sup> C spectra of compound <b>16a</b> |
| Page 8  | <sup>1</sup> H and <sup>13</sup> C spectra of compound <b>16b</b> |
| Page 9  | <sup>1</sup> H and <sup>13</sup> C spectra of compound <b>16c</b> |
| Page 10 | <sup>1</sup> H and <sup>13</sup> C spectra of compound <b>16d</b> |
| Page 11 | <sup>1</sup> H and <sup>13</sup> C spectra of compound <b>17</b>  |
| Page 12 | <sup>1</sup> H and <sup>13</sup> C spectra of compound <b>18</b>  |
| Page 13 | <sup>1</sup> H and <sup>13</sup> C spectra of compound <b>19a</b> |
| Page 14 | <sup>1</sup> H and <sup>13</sup> C spectra of compound <b>19b</b> |
| Page 15 | <sup>1</sup> H and <sup>13</sup> C spectra of compound <b>19c</b> |
| Page 16 | <sup>1</sup> H and <sup>13</sup> C spectra of compound <b>19d</b> |
| Page 17 | <sup>1</sup> H and <sup>13</sup> C spectra of compound <b>20a</b> |
| Page 18 | <sup>1</sup> H and <sup>13</sup> C spectra of compound <b>20b</b> |
| Page 19 | <sup>1</sup> H and <sup>13</sup> C spectra of compound <b>20c</b> |
| Page 20 | <sup>1</sup> H and <sup>13</sup> C spectra of compound <b>20d</b> |

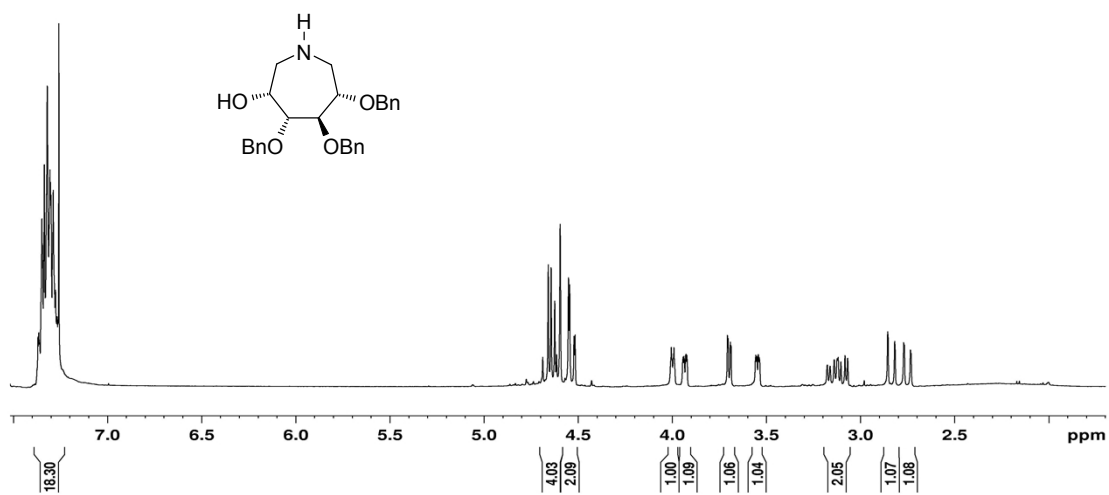

$^1\text{H}$  NMR spectrum of **14**, 400 MHz,  $\text{CDCl}_3$

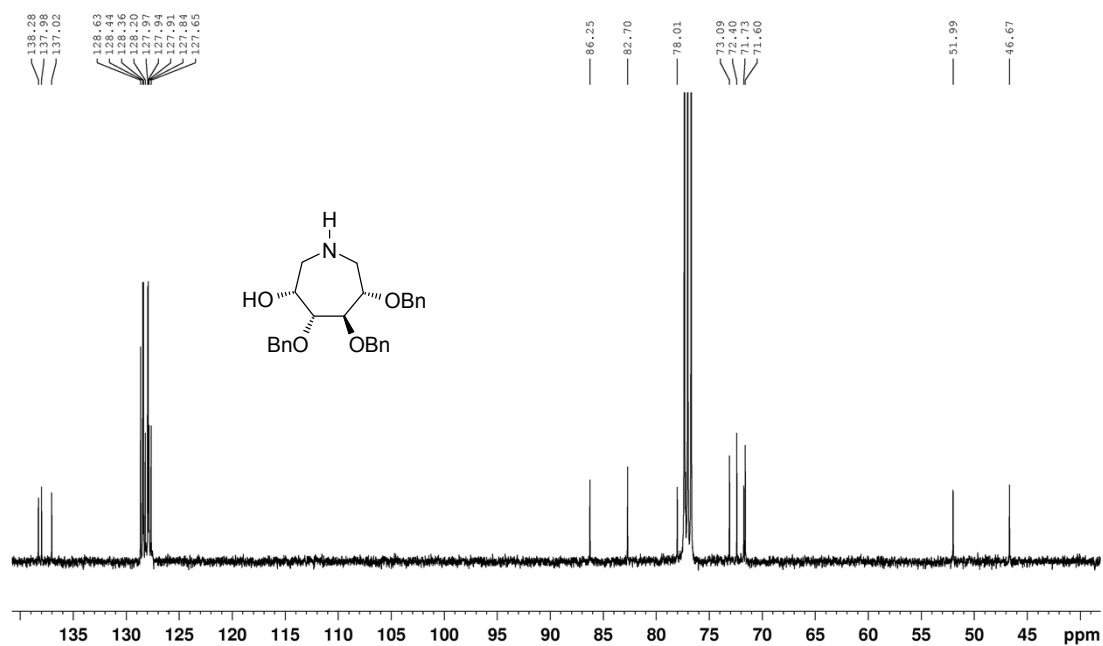

$^{13}\text{C}$  NMR spectrum of **14**, 100 MHz,  $\text{CDCl}_3$

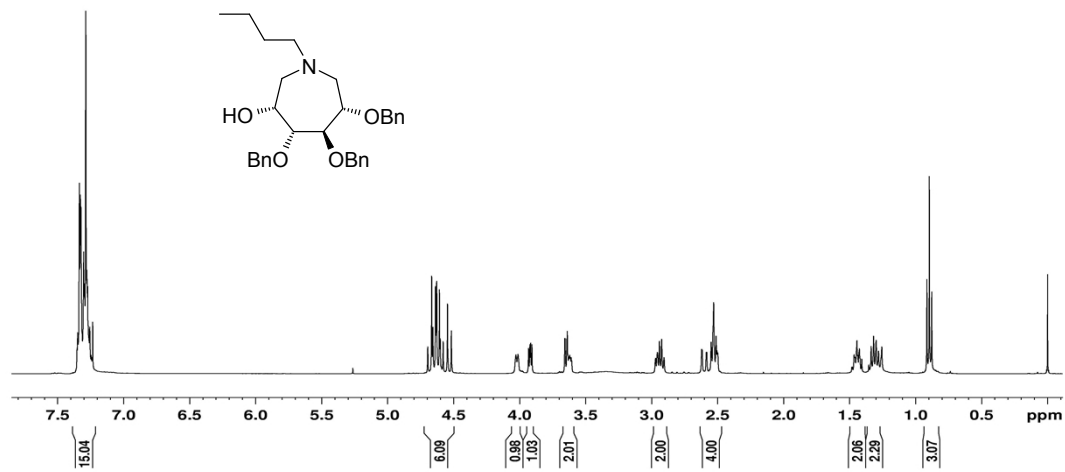

$^1\text{H}$  NMR spectrum of **15a**, 400 MHz,  $\text{CDCl}_3$

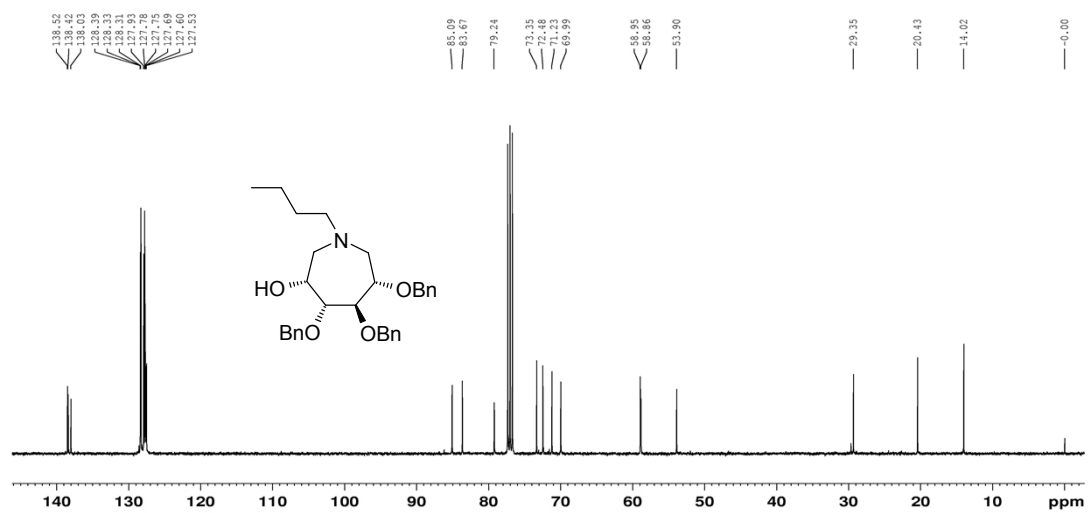

$^{13}\text{C}$  NMR spectrum of **15a**, 100 MHz,  $\text{CDCl}_3$

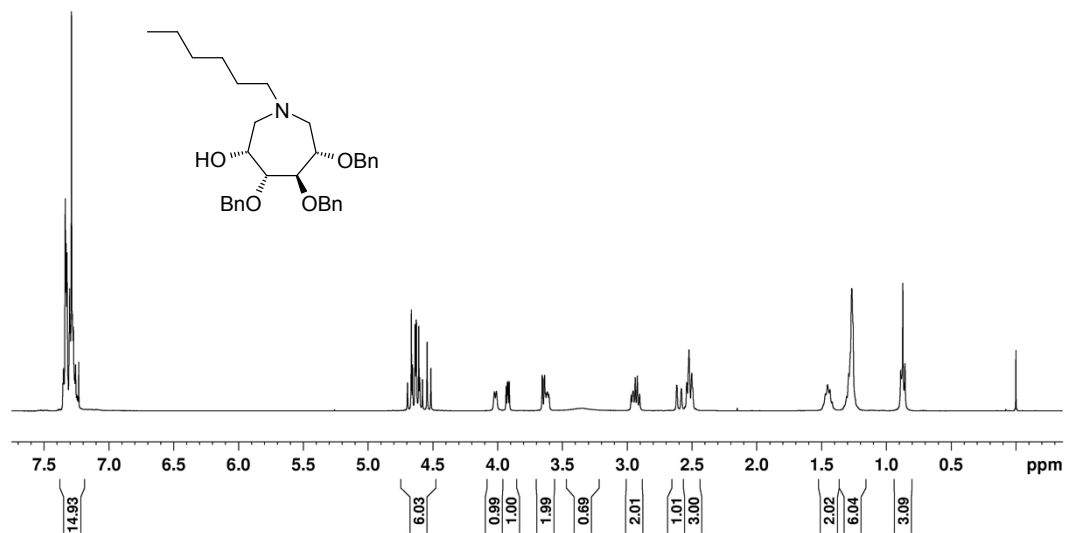

$^1\text{H}$  NMR spectrum of **15b**, 400 MHz,  $\text{CDCl}_3$

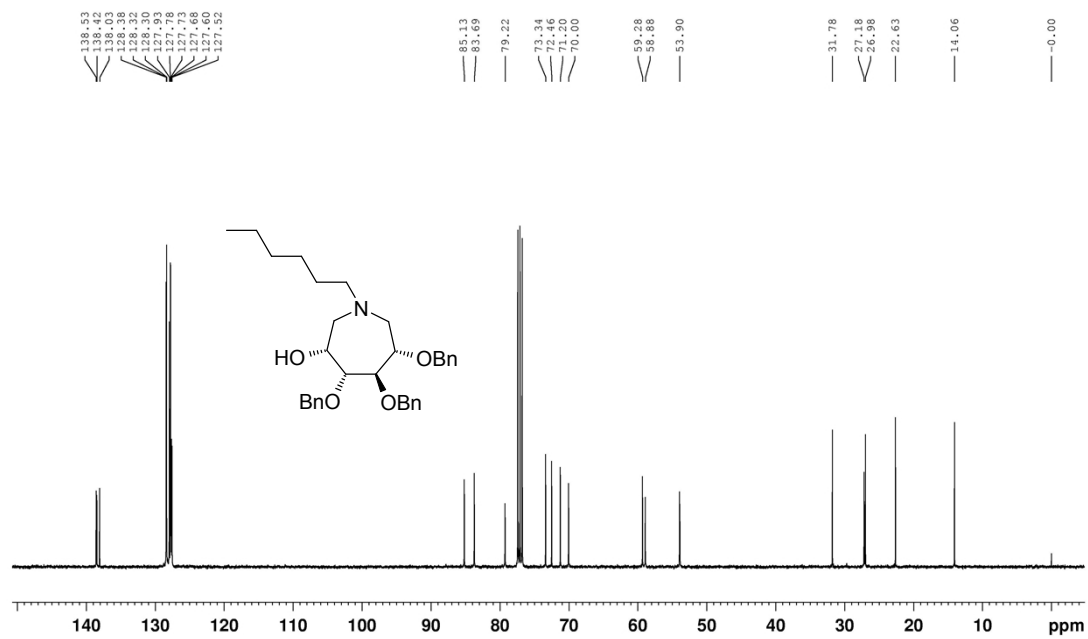

$^{13}\text{C}$  NMR spectrum of **15b**, 100 MHz,  $\text{CDCl}_3$

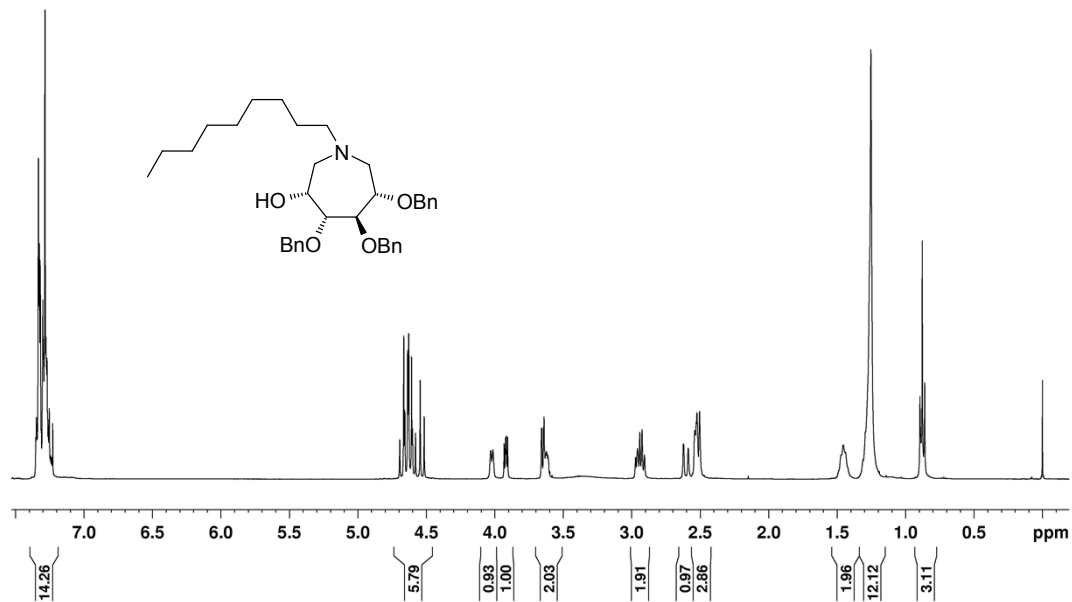

<sup>1</sup>H NMR spectrum of **15c**, 400 MHz, CDCl<sub>3</sub>

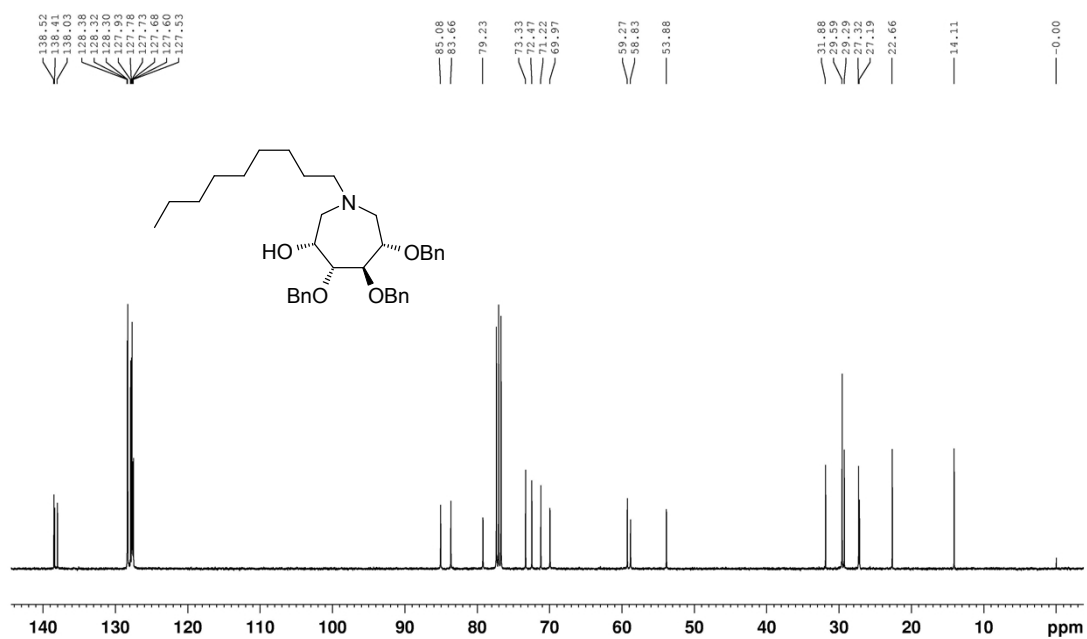

<sup>13</sup>C NMR spectrum of **15c**, 100 MHz, CDCl<sub>3</sub>

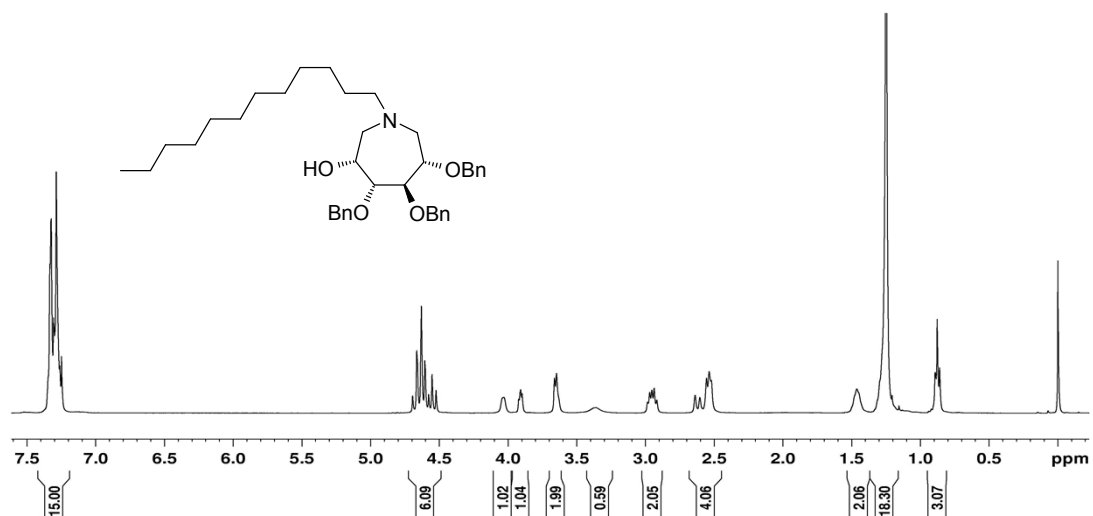

<sup>1</sup>H NMR spectrum of **15d**, 400 MHz, CDCl<sub>3</sub>

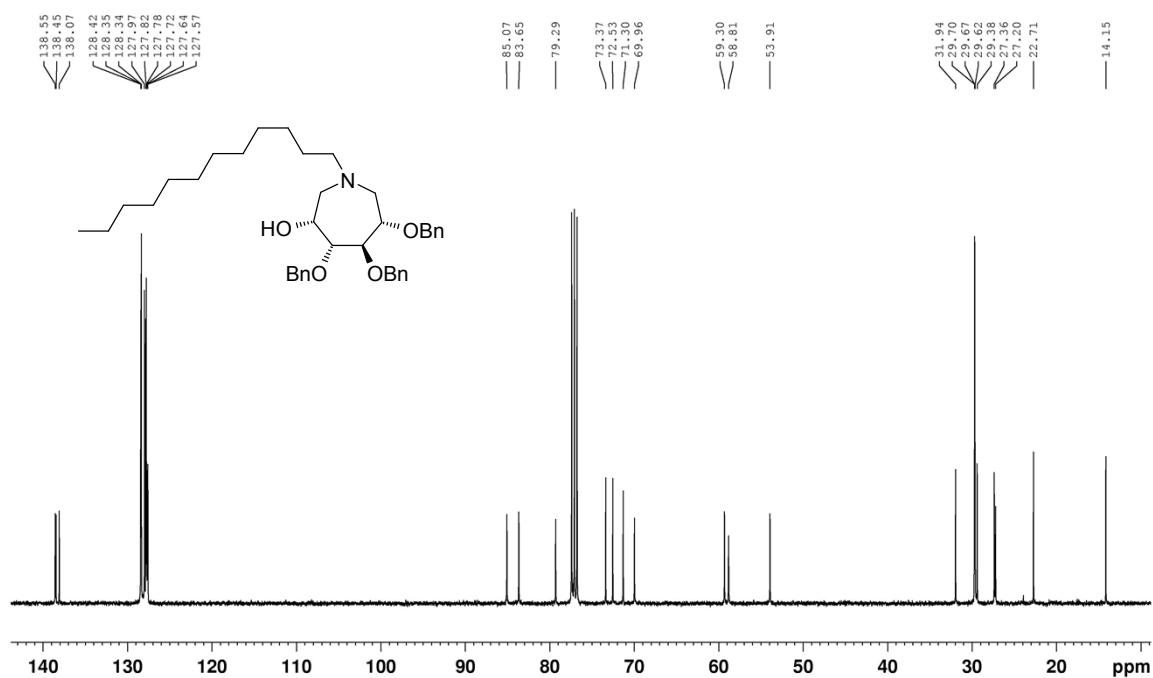

<sup>13</sup>C NMR spectrum of **15d**, 100 MHz, CDCl<sub>3</sub>

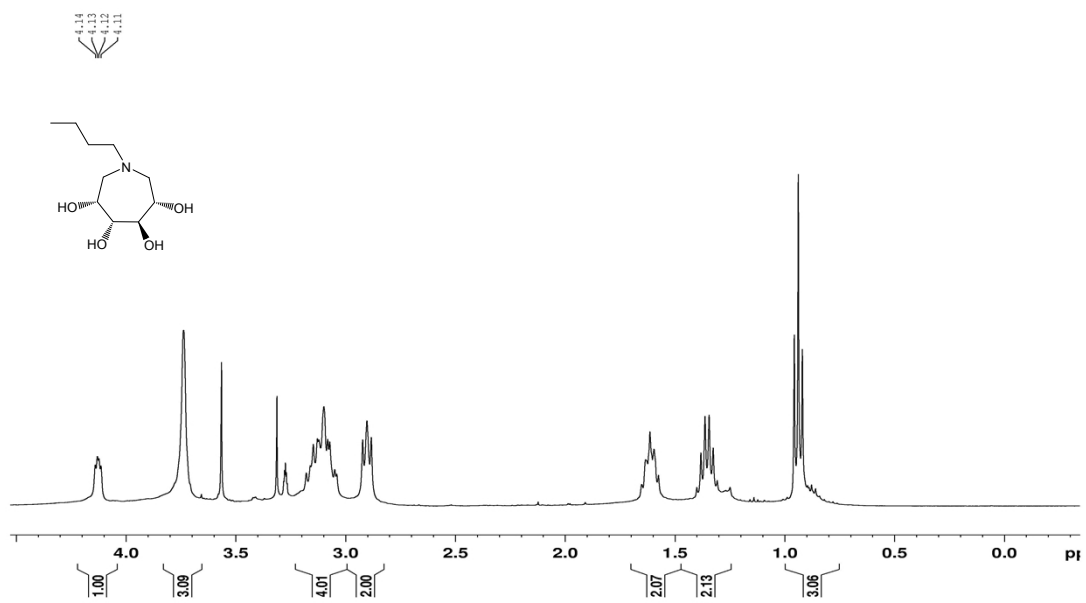

$^1\text{H}$  NMR spectrum of **16a**, 400 MHz,  $\text{CD}_3\text{OD}$

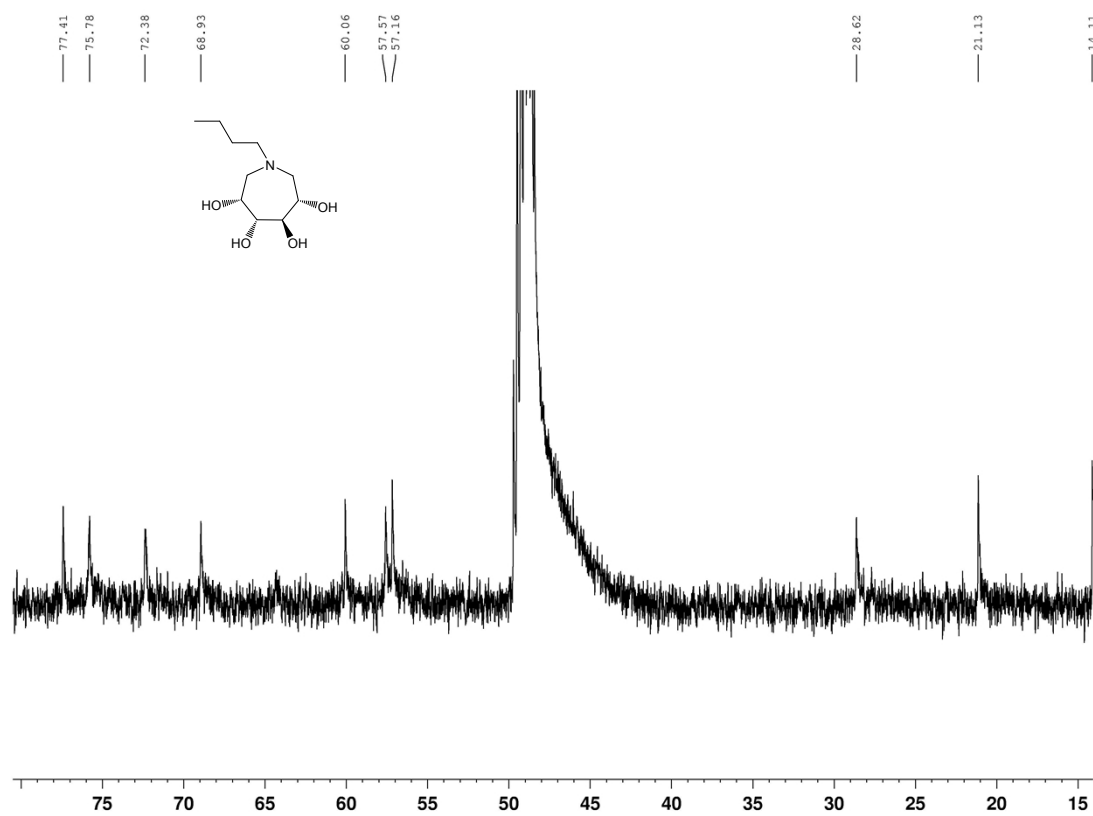

$^{13}\text{C}$  NMR spectrum of **16a**, 100 MHz,  $\text{CD}_3\text{OD}$

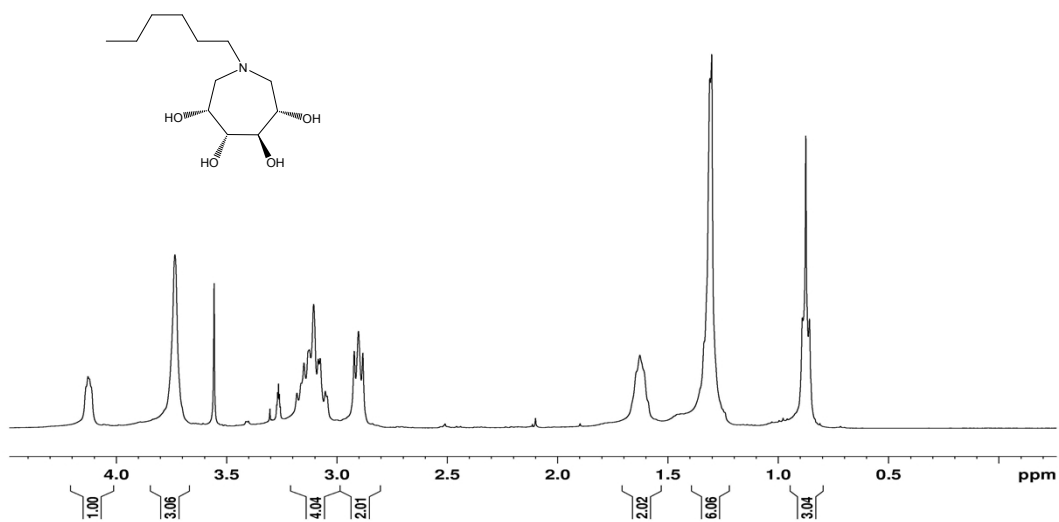

$^1\text{H}$  NMR spectrum of **16b**, 400 MHz,  $\text{CD}_3\text{OD}$

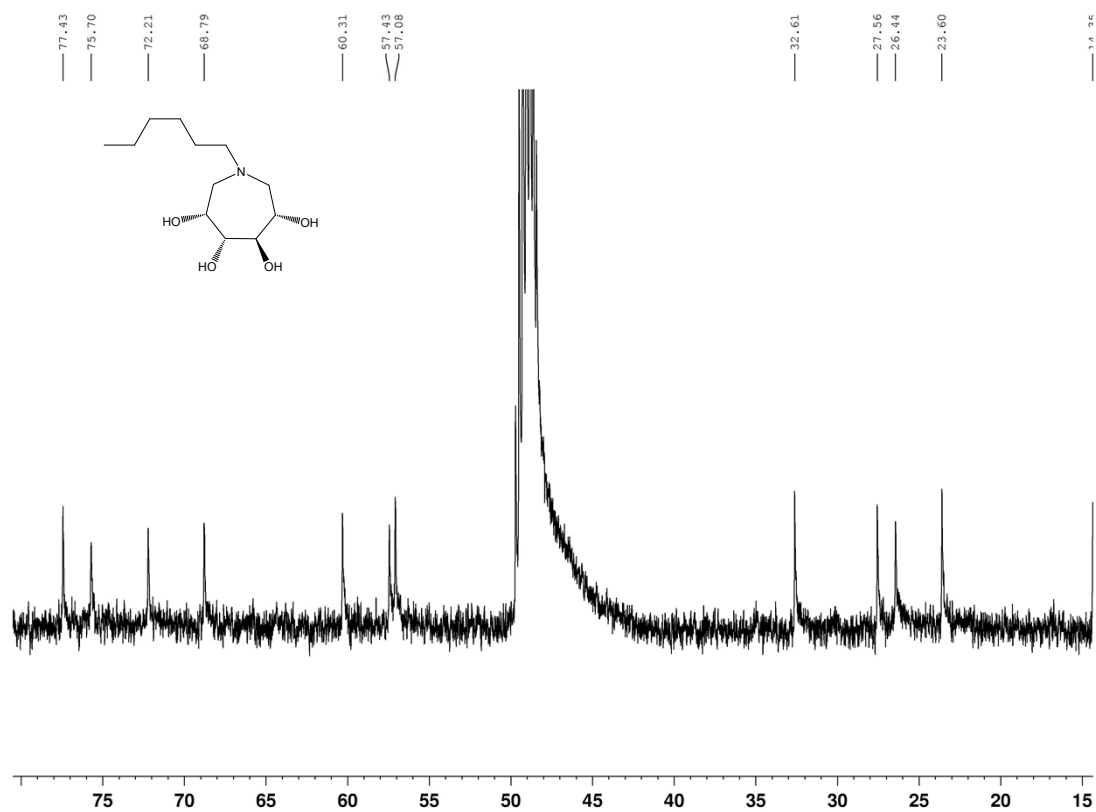

$^{13}\text{C}$  NMR spectrum of **16b**, 100 MHz,  $\text{CD}_3\text{OD}$



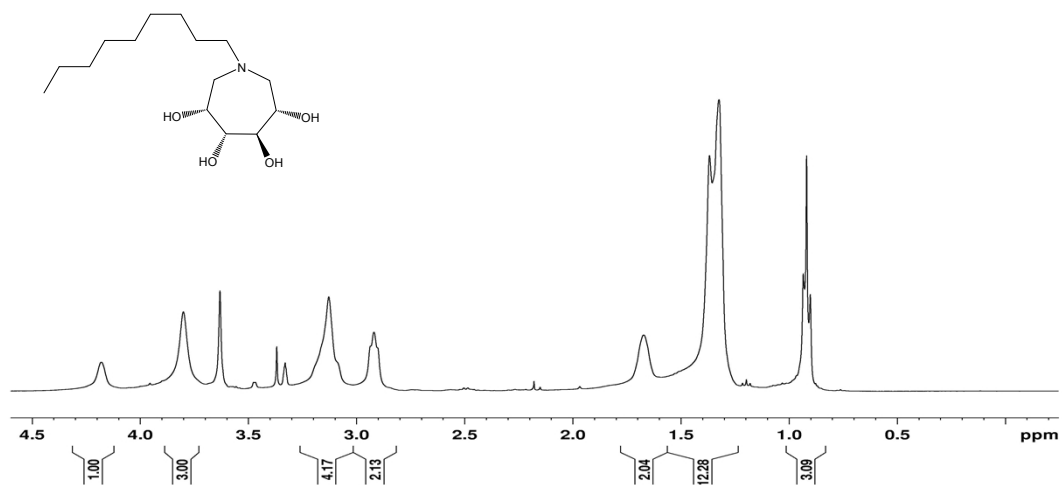

$^1\text{H}$  NMR spectrum of **16c**, 400 MHz,  $\text{CD}_3\text{OD}$

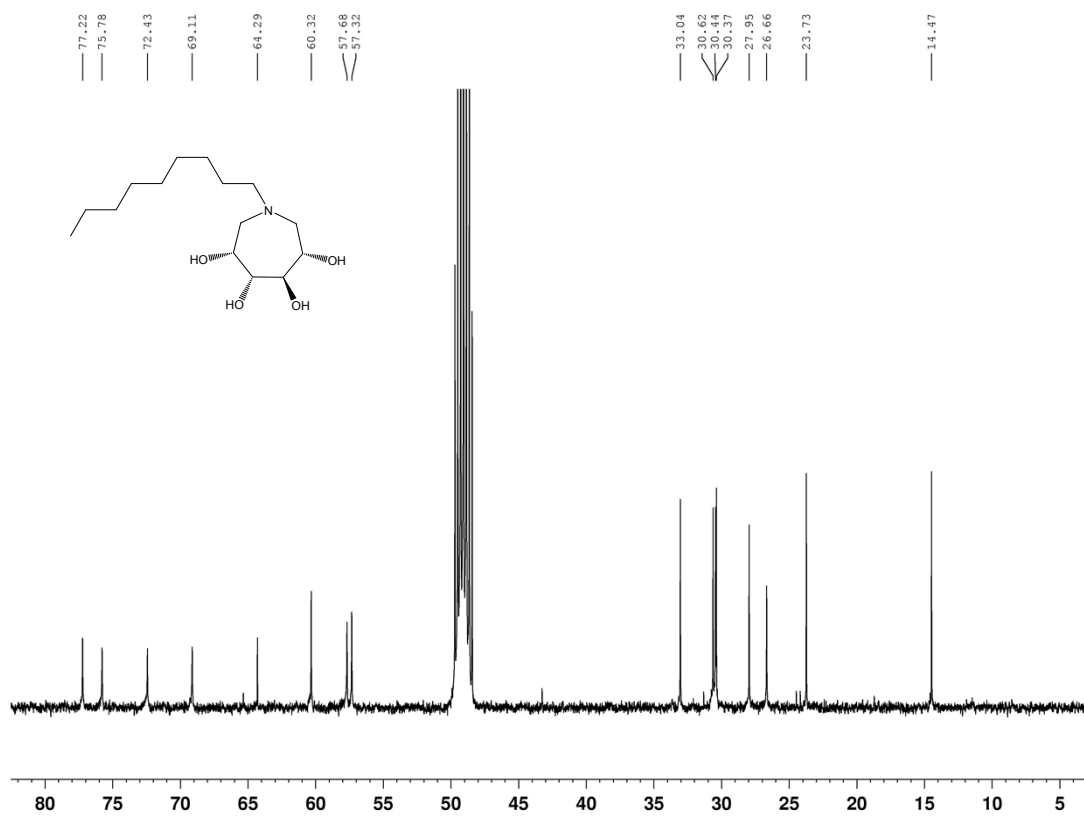

$^{13}\text{C}$  NMR spectrum of **16c**, 100 MHz,  $\text{CD}_3\text{OD}$

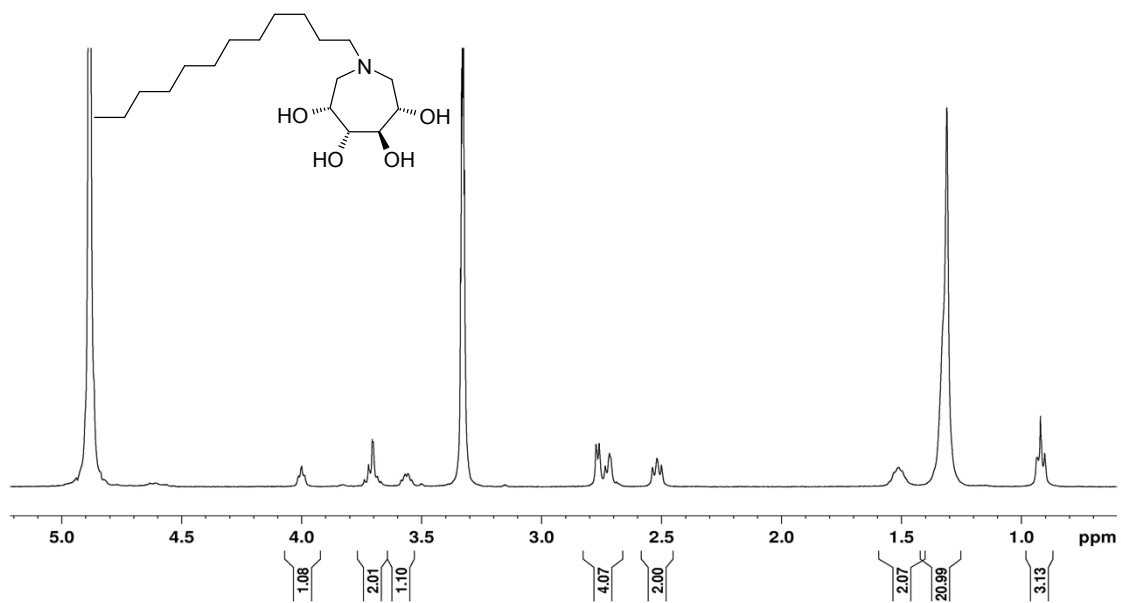

$^1\text{H}$  NMR spectrum of **16d**, 400 MHz,  $\text{CD}_3\text{OD}$

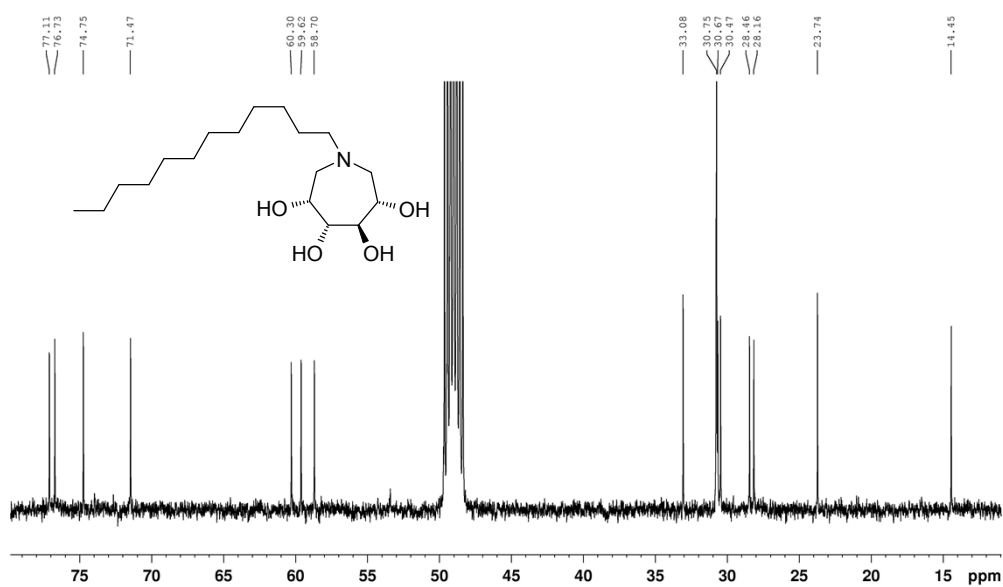

$^{13}\text{C}$  NMR spectrum of **16d**, 100 MHz,  $\text{CD}_3\text{OD}$

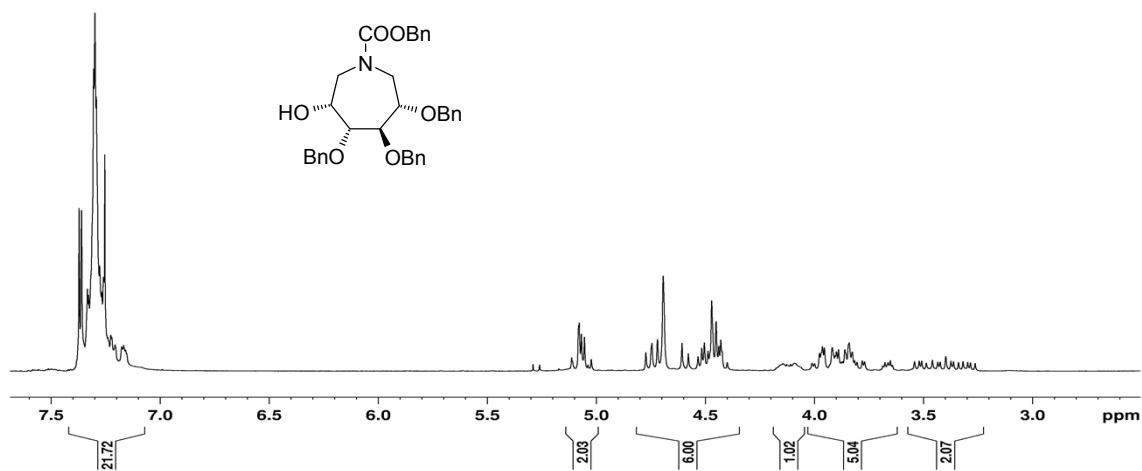

$^1\text{H}$  NMR spectrum of **17**, 400 MHz,  $\text{CDCl}_3$

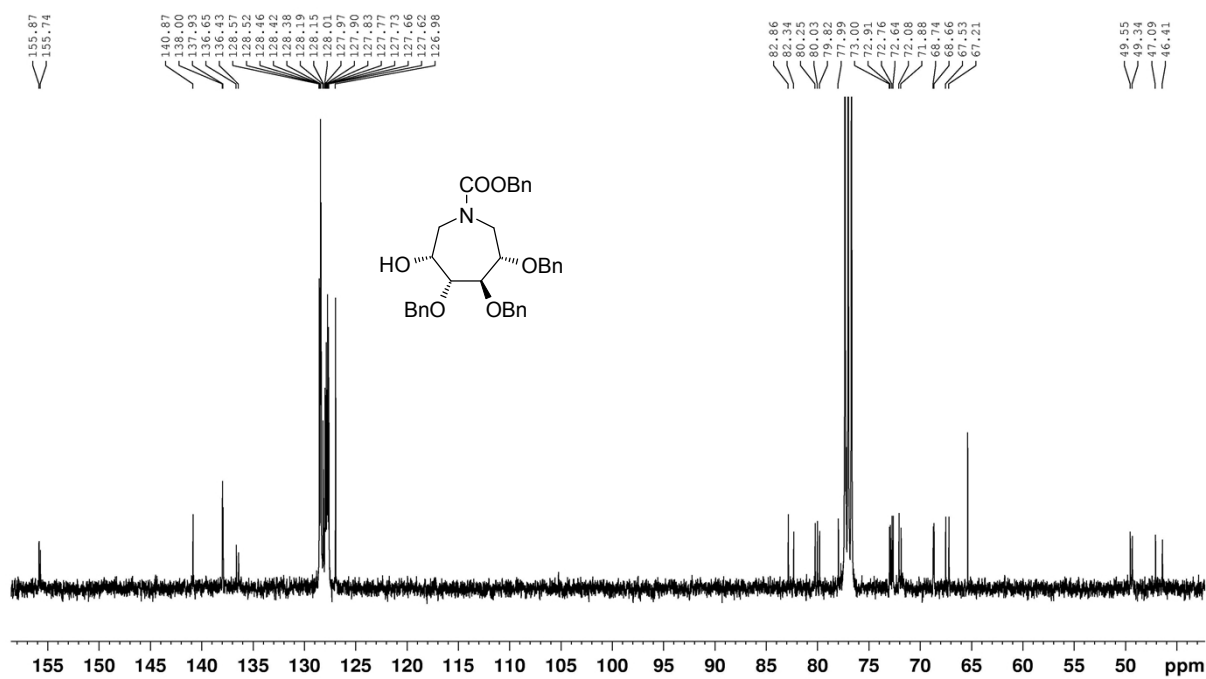

$^{13}\text{C}$  NMR spectrum of **17**, 100 MHz,  $\text{CDCl}_3$

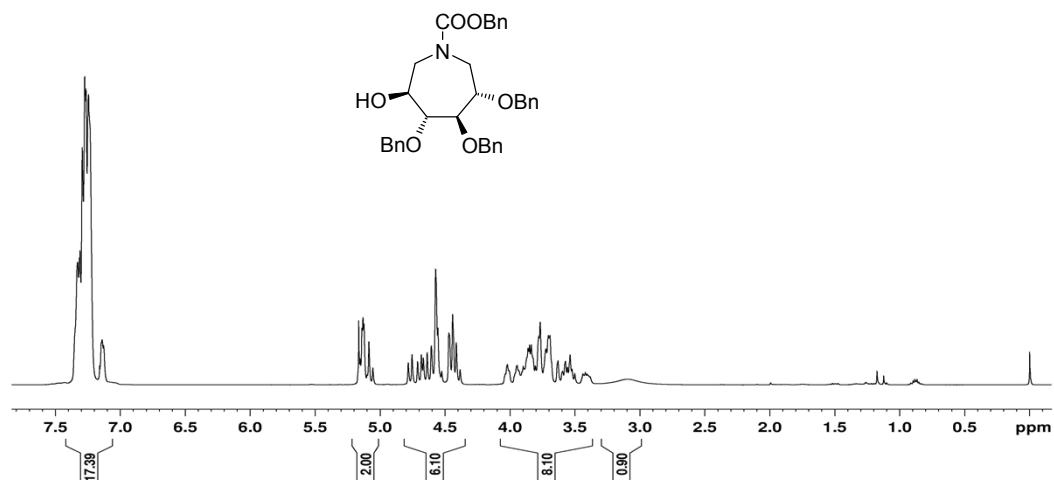

<sup>1</sup>H NMR spectrum of **18**, 400 MHz, CDCl<sub>3</sub>

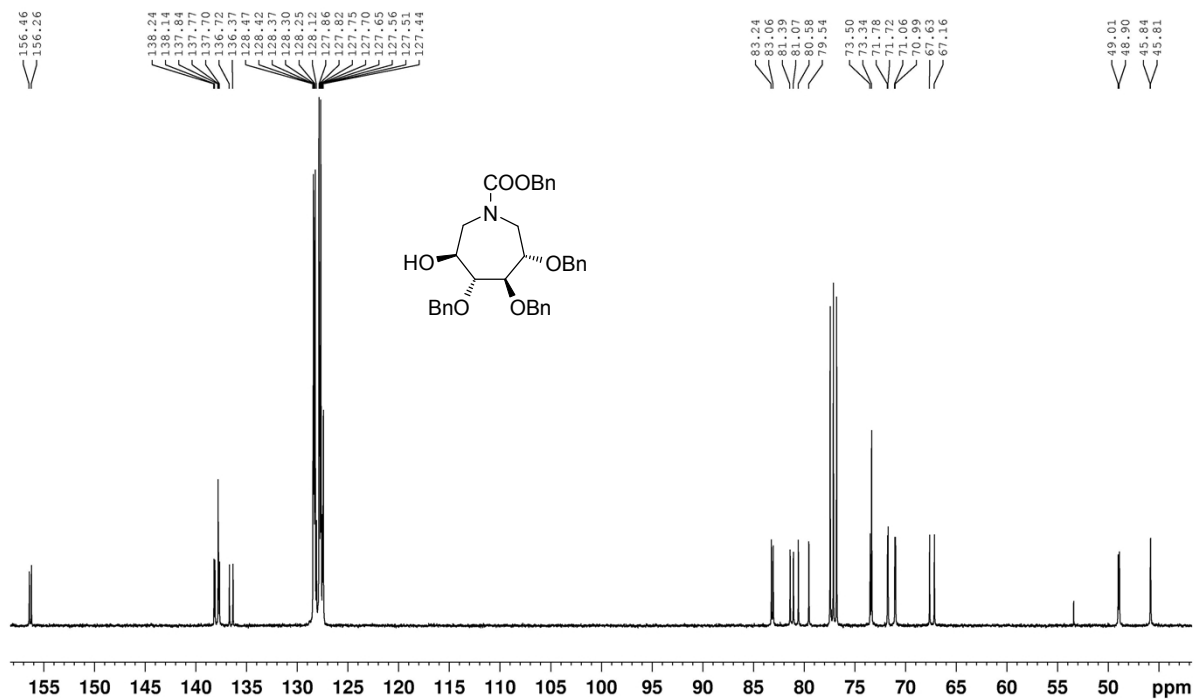

<sup>13</sup>C NMR spectrum of **18**, 100 MHz, CDCl<sub>3</sub>

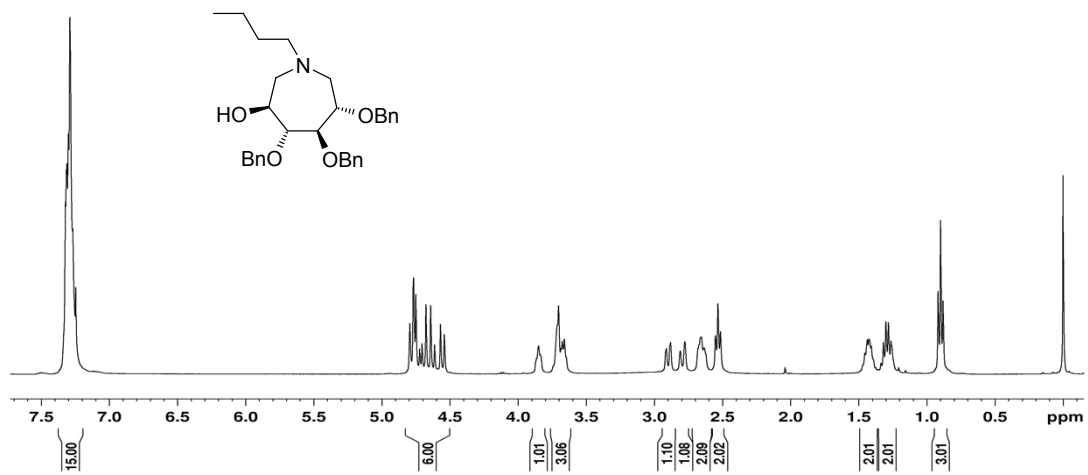

$^1\text{H}$  NMR spectrum of **19a**, 400 MHz,  $\text{CDCl}_3$

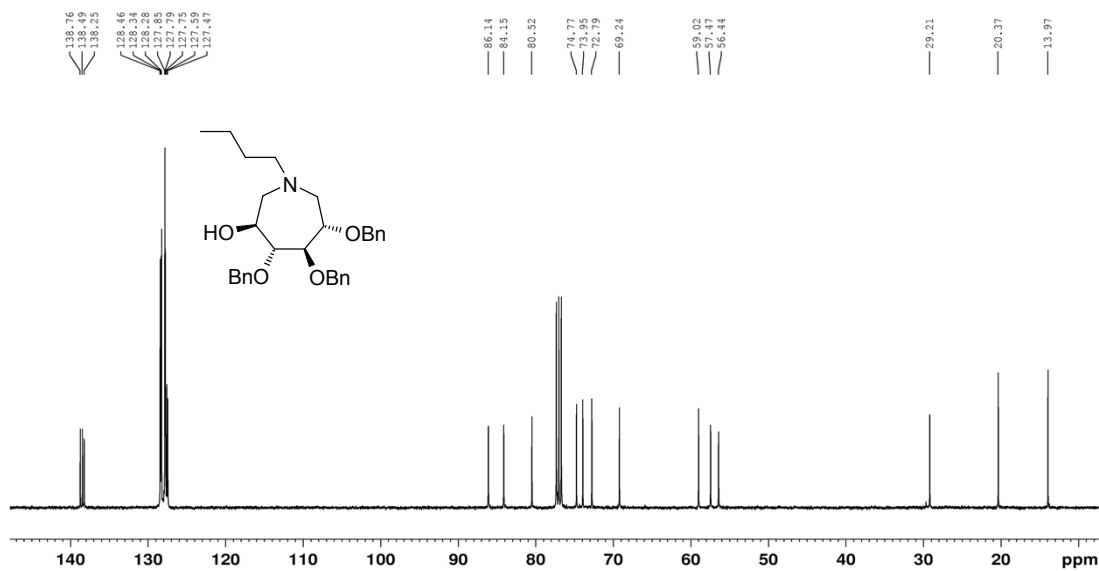

$^{13}\text{C}$  NMR spectrum of **19a**, 100 MHz,  $\text{CDCl}_3$

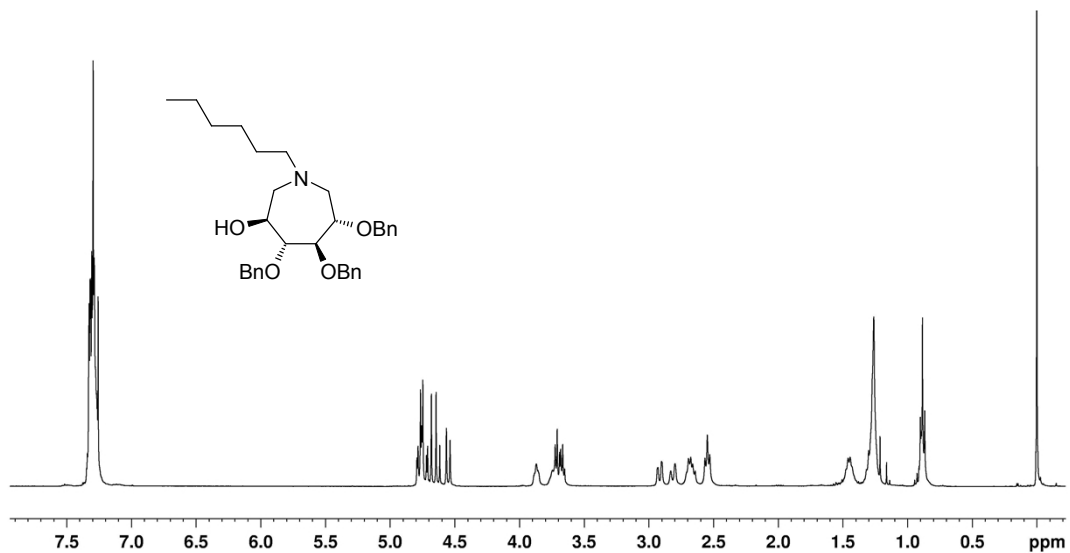

$^1\text{H}$  NMR spectrum of **19b**, 400 MHz,  $\text{CDCl}_3$

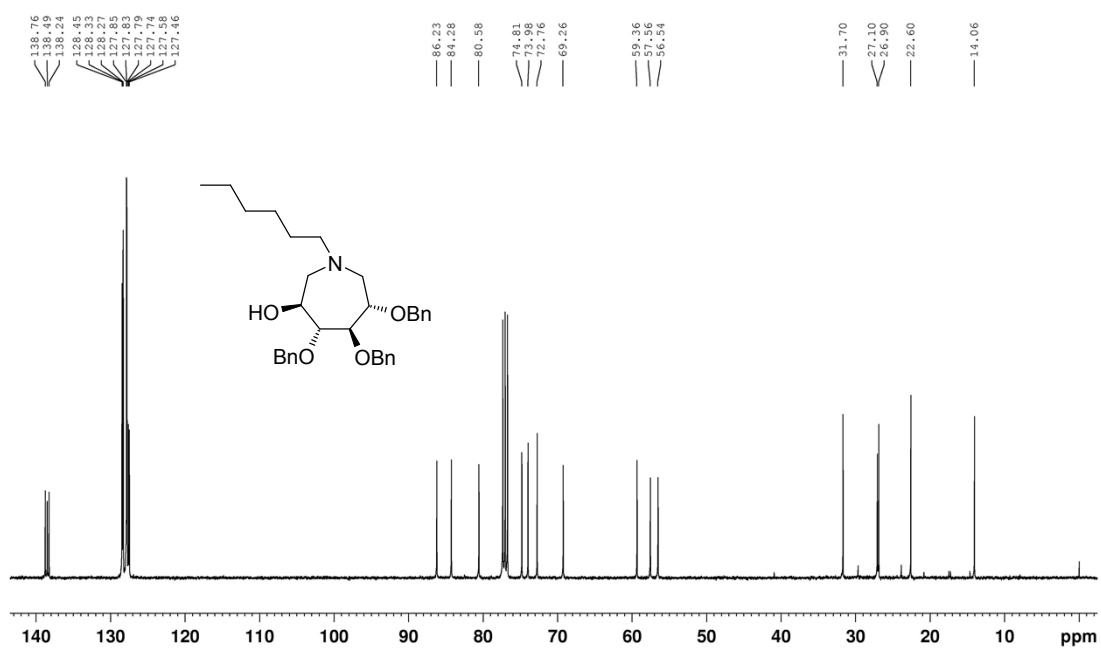

$^{13}\text{C}$  NMR spectrum of **19b**, 100 MHz,  $\text{CDCl}_3$

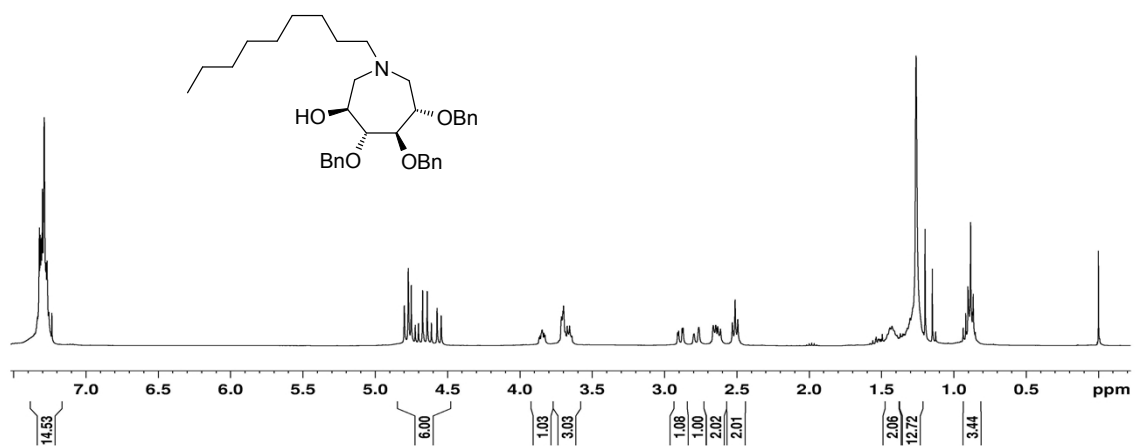

$^1\text{H}$  NMR spectrum of **19c**, 400 MHz,  $\text{CDCl}_3$

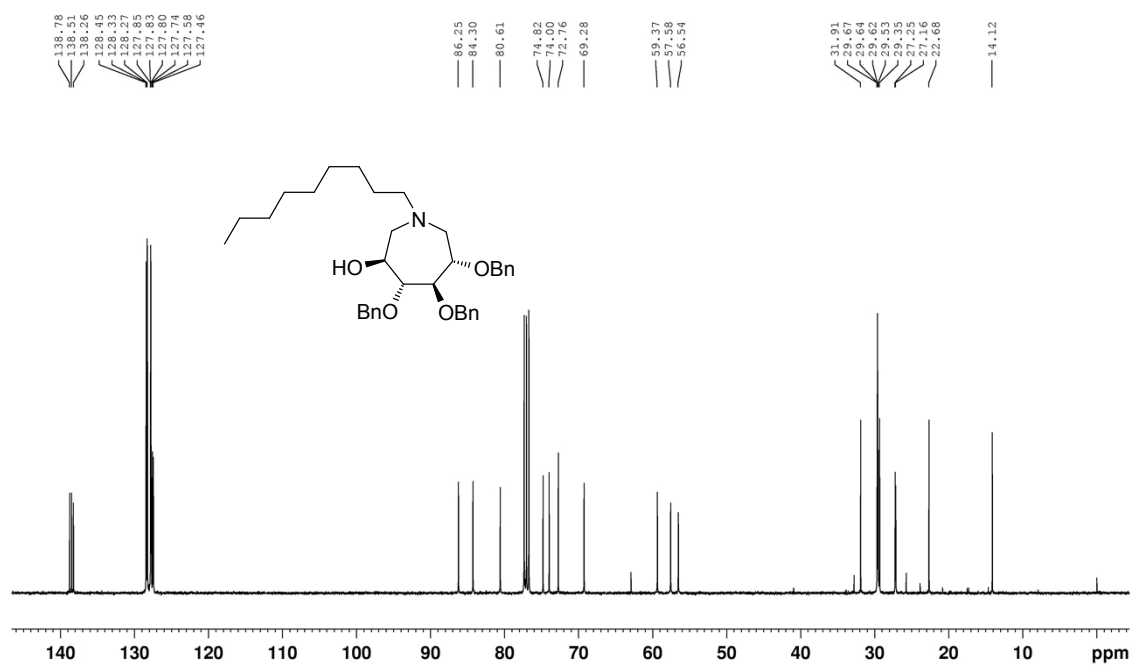

$^{13}\text{C}$  NMR spectrum of **19c**, 100 MHz,  $\text{CDCl}_3$

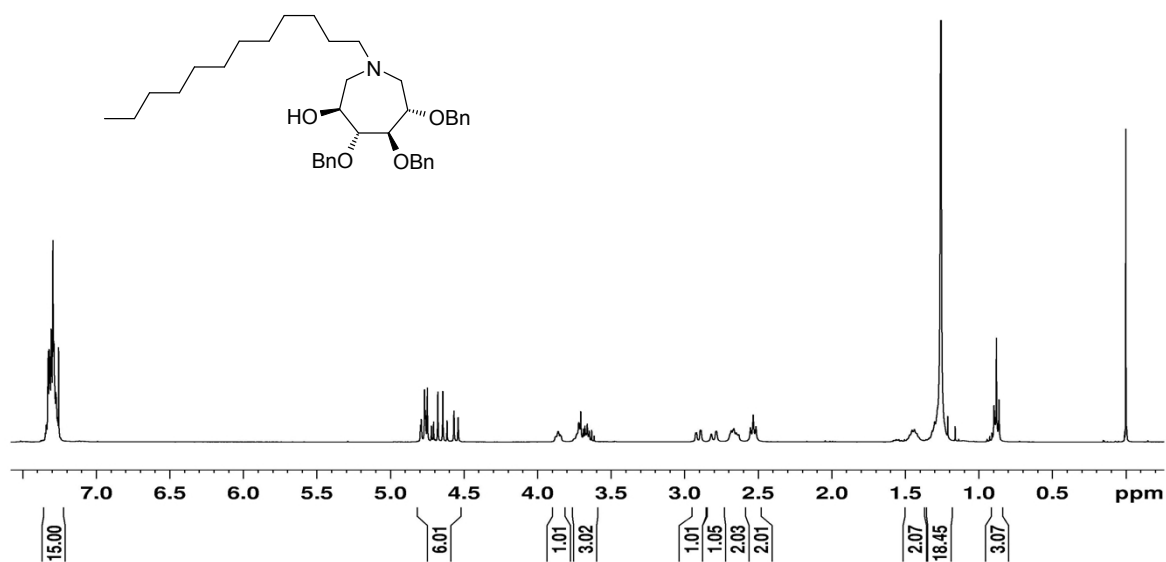

$^1\text{H}$  NMR spectrum of **19d**, 400 MHz,  $\text{CDCl}_3$

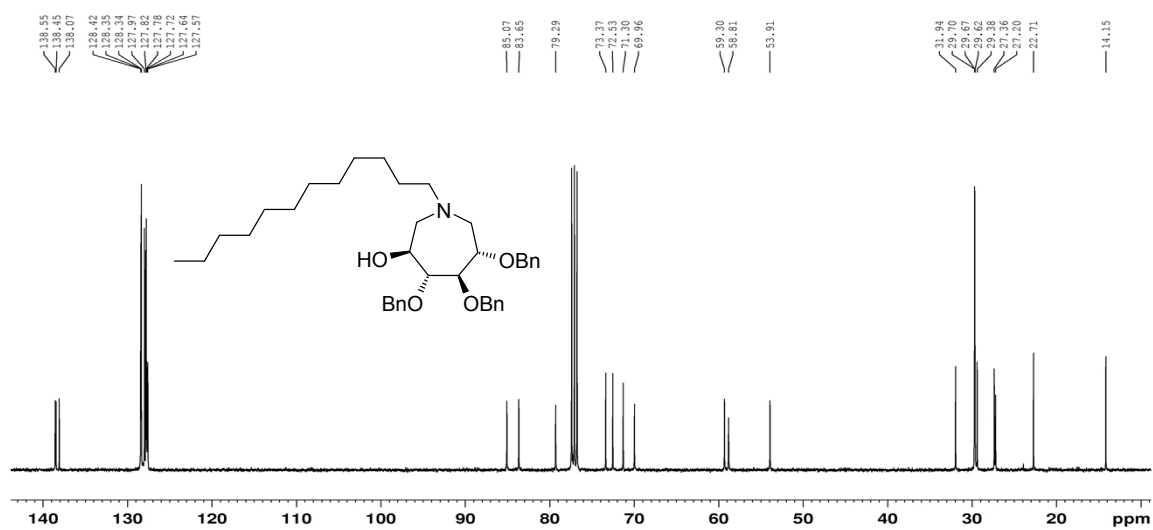

$^{13}\text{C}$  NMR spectrum of **19d**, 100 MHz,  $\text{CDCl}_3$



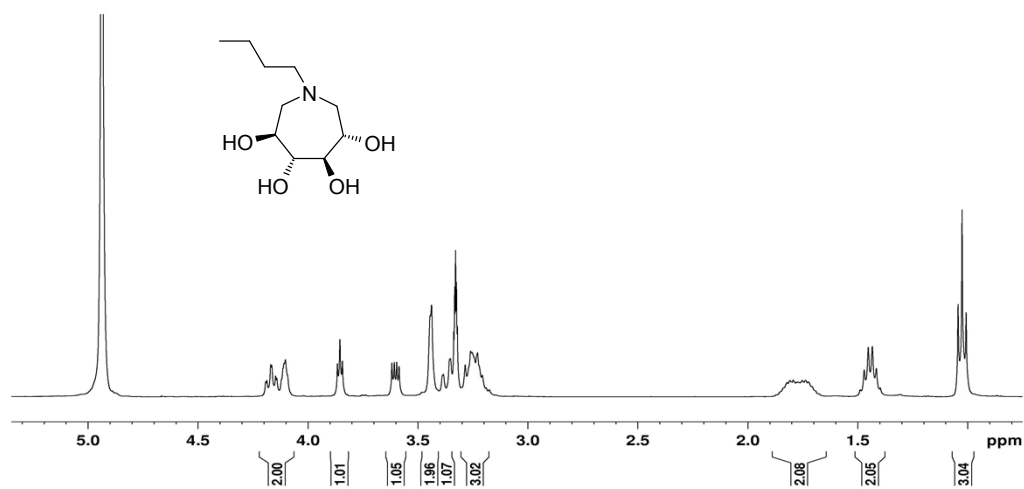

$^1\text{H}$  NMR spectrum of **20a**, 400 MHz,  $\text{CD}_3\text{OD}$

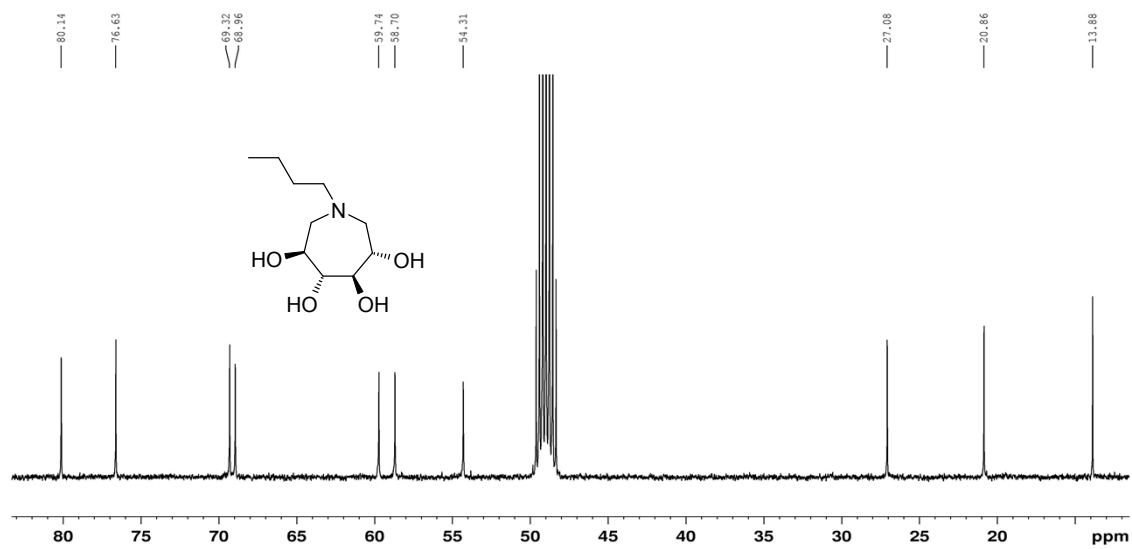

$^{13}\text{C}$  NMR spectrum of **20a**, 100 MHz,  $\text{CD}_3\text{OD}$

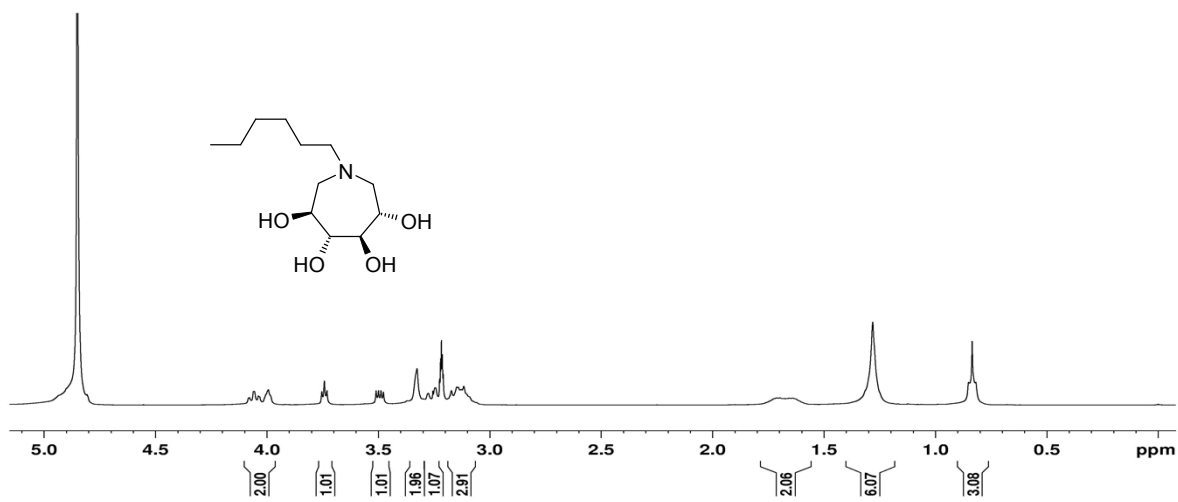

$^1\text{H}$  NMR spectrum of **20b**, 400 MHz,  $\text{CD}_3\text{OD}$

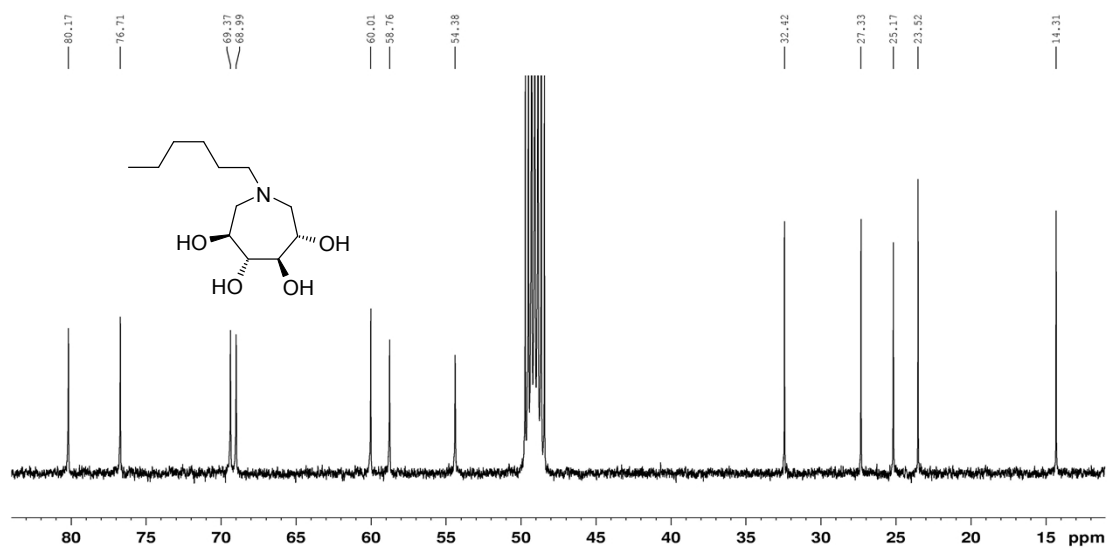

$^{13}\text{C}$  NMR spectrum of **20b**, 100 MHz,  $\text{CD}_3\text{OD}$

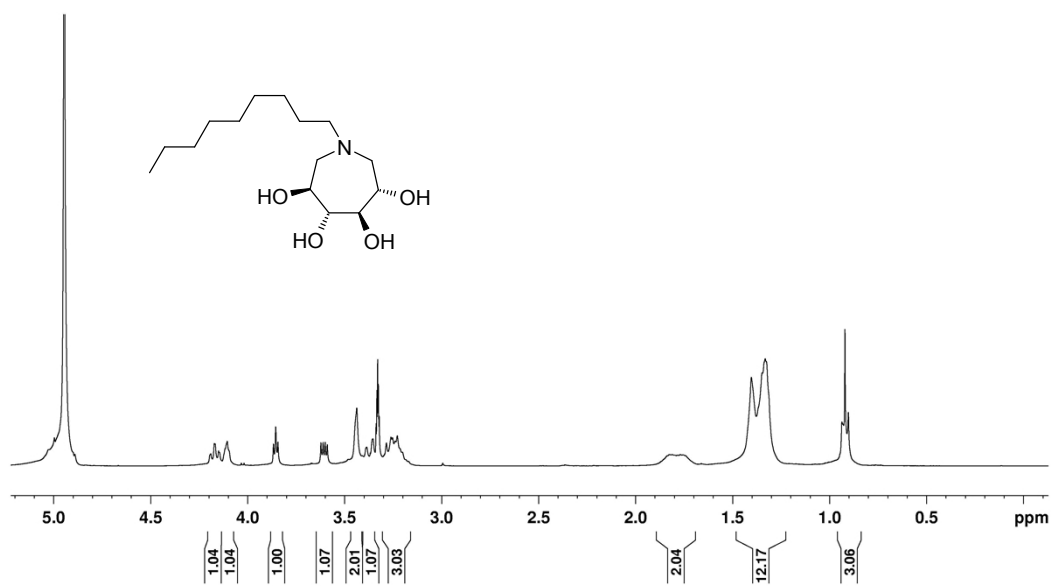

$^1\text{H}$  NMR spectrum of **20c**, 400 MHz,  $\text{CD}_3\text{OD}$

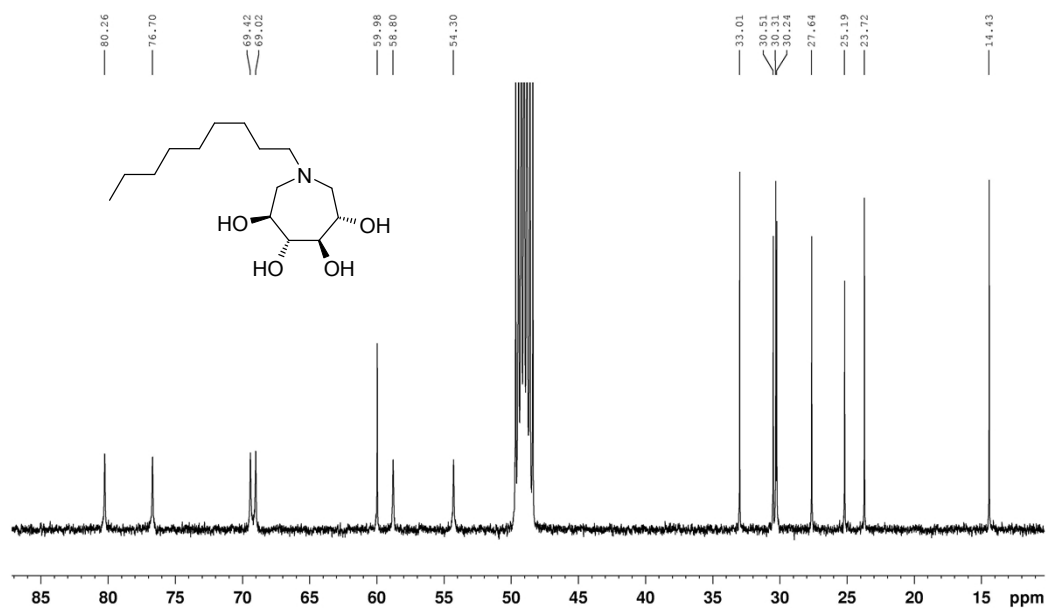

$^{13}\text{C}$  NMR spectrum of **20c**, 100 MHz,  $\text{CD}_3\text{OD}$

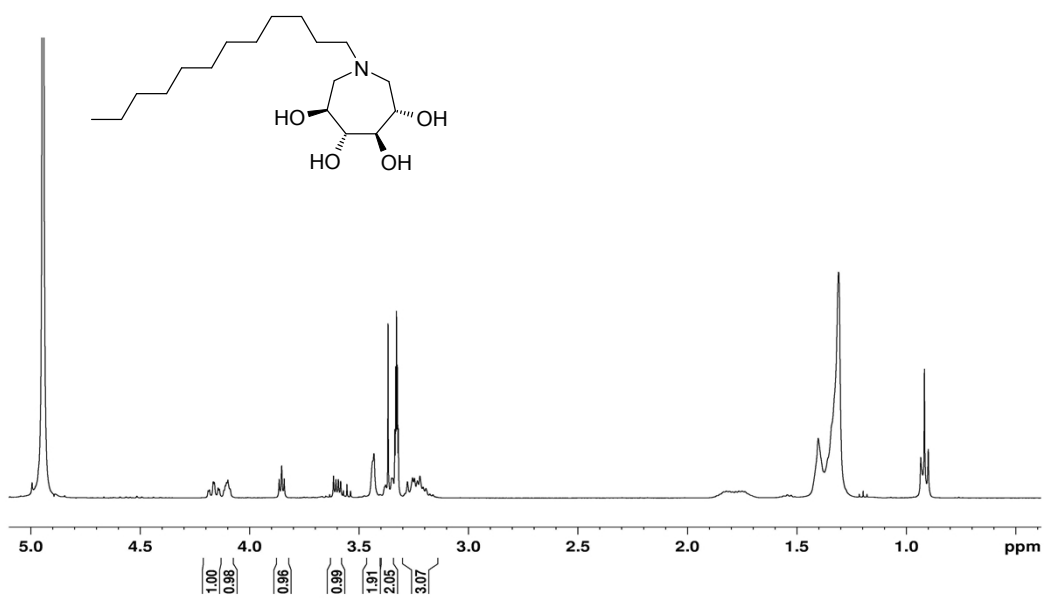

$^1\text{H}$  NMR spectrum of **20d**, 400 MHz,  $\text{CD}_3\text{OD}$

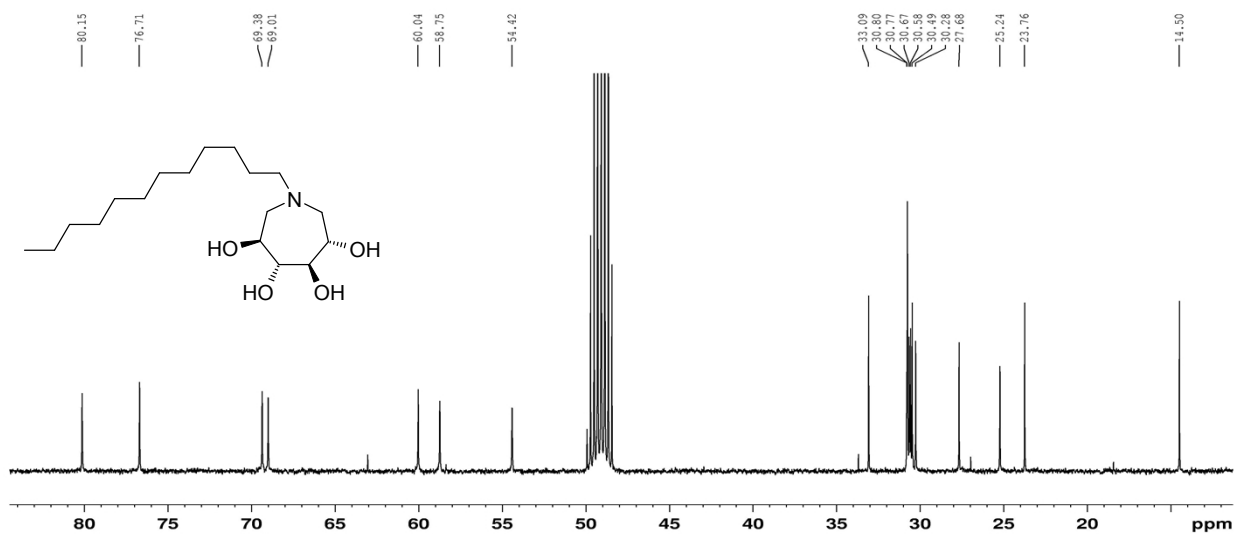

$^{13}\text{C}$  NMR spectrum of **20d**, 100 MHz,  $\text{CD}_3\text{OD}$
